# Supplementary material
Source: publisher figshare collection journal article supplement (https://gsajournals.figshare.com/ndownloader/files/35133487)
Supplement: Supplementary file 1 [file 35133487]

## Sheet: Sheet1 (2)
Data type	Experimental species	Symbol/name used in publication	Source – public	Source – published	Source – unpublished	Identifiers	New reagent	Comments
Data type (mandatory) Duplicate rows as needed. Order is flexible, but row titles must be preserved.	Experimental species (mandatory, "NA" okay)	Symbol/name used in publication (mandatory)	Source – public [stock center; company, data repository] (one of D,E,F mandatory)	Source -- published [PMID or 'this paper'] (one of D,E,F mandatory)	Source – unpublished [description, incl. lab of origin] (one of D,E,F mandatory)	Identifiers [format as ID_source:identifier] Separate multiple entries with semi-colon, space	New reagent (mandatory for new entities) Description, progenitor(s)	Comments (optional) Genotypes, purpose of reagent, additional information
large-scale dataset	zebrafish	hnf4g RNA-seq and hnf4a;hnf4g RNA-seq data	Gene Expression Omnibus: GSE183799	this paper		GSE183799	RNA-sequencing data from dissected GI tract of 6dpf larval zebrafish. Genotypes/Conditions include: WTCV, WTGF, hnf4g-/-CV, hnf4g-/-GF, WTCR, hnf4g-/-CR, hnf4a-/-;hnf4g-/-CR
genetic reagent (in whole organism)	zebrafish	hnf4ardu14		PMID: 28385711
genetic reagent (in whole organism)	zebrafish	hnf4grdu58		this paper			hnf4grdu58 allele generated by CRSIPR/Cas injection, single base-pair deletion predicted to result in a nonsense mutation beginning at amino acid 62 and a premature stop codon after amino acid 126. Made in the Tü background and ingressed into TL and EK backgrounds.
genetic reagent (in whole organism)	zebrafish	hnf4grdu59		this paper			hnf4grdu59 allele generated by CRSIPR/Cas injection, eight base-pair insertion predicted to result in a nonsense mutation also beginning at amino acid 62 and ending after amino acid 73 in a premature stop codon. Made in the Tü background and ingressed into TL and EK backgrounds
genetic reagent (in whole organism)	zebrafish	hnf4bsa21135		this paper	Generated as part of the Zebrafish Mutation Project: PMID: 23594742		hnf4bsa21135 allele was generated and acquired from the Zebrafish Mutation Project. hnf4bsa21135 allele is a point mutation which results in a stop codon being introduced after amino acid 55
genetic reagent (in whole organism)	zebrafish	Tg(-4.5fabp2:DsRed)pd1000		PMID: 21439961
genetic reagent (in whole organism)	zebrafish	Tg(fabp6:GFP)rdu22		PMID: 28850571
genetic reagent (in whole organism)	zebrafish	Tg(in3.4:cfos:GFP)nc2b		PMID: 22479192
gene (source not applicable)
strain, strain_background
genetic reagent (in whole organism)
cell line
transfected construct (in cell line)
antibody
recombinant DNA reagent
sequence-based reagent
peptide, recombinant protein
large-scale dataset
commercial assay
chemical compound, drug
software, algorithm
other

## Sheet: Sheet1
Data type	Experimental species	Symbol/name used in publication	Source – public	Source – published	Source – unpublished	Identifiers	New reagent	Comments
Data type (mandatory) Duplicate rows as needed. Order is flexible, but row titles must be preserved.	Experimental species (mandatory, "NA" okay)	Symbol/name used in publication (mandatory)	Source – public [stock center; company, data repository] (one of D,E,F mandatory)	Source -- published [PMID or 'this paper'] (one of D,E,F mandatory)	Source – unpublished [description, incl. lab of origin] (one of D,E,F mandatory)	Identifiers [format as ID_source:identifier] Separate multiple entries with semi-colon, space	New reagent (mandatory for new entities) Description, progenitor(s)	Comments (optional) Genotypes, purpose of reagent, additional information
gene (source not applicable)			NA	NA	NA
strain, strain_background
genetic reagent (in whole organism)
cell line
transfected construct (in cell line)
antibody
recombinant DNA reagent
sequence-based reagent
peptide, recombinant protein
large-scale dataset
commercial assay	NA
chemical compound, drug	NA
software, algorithm	NA
other
